# Supplementary material for: A diverse collection of B cells responded to HIV infection in infant BG505
Source: PubMed Central journal article supplement — Cell Rep Med. 2021 Jun 15;2(6):100314. doi: 10.1016/j.xcrm.2021.100314 (PMC8233660; doi:10.1016/j.xcrm.2021.100314), 2021-06-15
Supplement: mmc1.pdf [file mmc1.pdf]

**Cell Reports Medicine, Volume 2**

**Supplemental information**

**A diverse collection of B cells responded  
to HIV infection in infant BG505**

**Cassandra Simonich, Mackenzie M. Shipley, Laura Doepker, Theodore Gobillot, Meghan Garrett, Evan M. Cale, Brianna Hennessy, Hannah Itell, Vrasha Chohan, Nicole Doria-Rose, Ruth Nduati, and Julie Overbaugh**

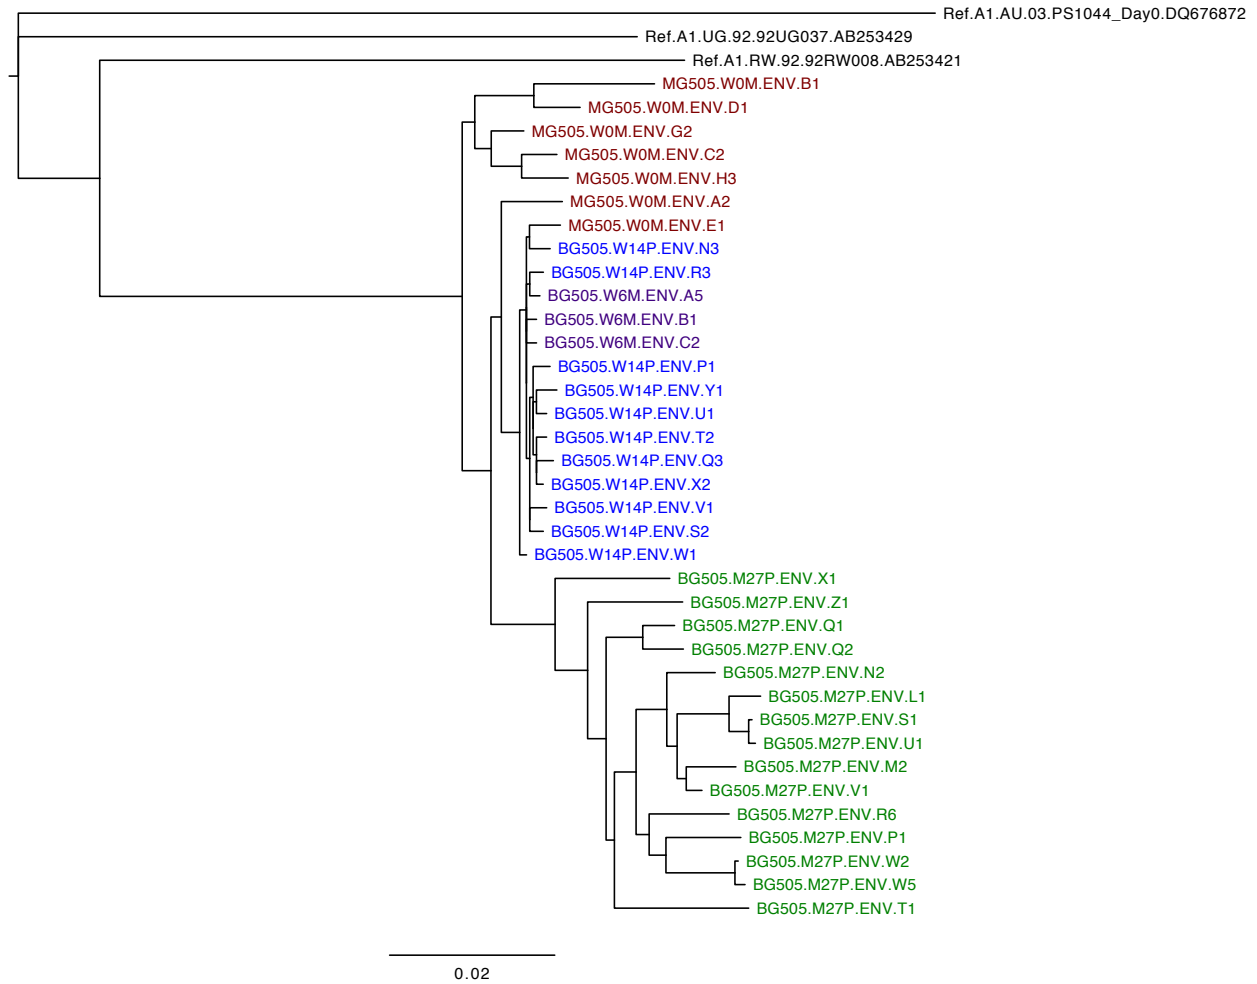

**Figure S1. Phylogenetic tree of BG505 Env variants, related to Figure 3.** Maximum likelihood phylogenetic tree of maternal- (MG505) and infant-derived (BG505) Envelope variants. Maternal variants were isolated around the time of delivery (W0, red; (Wu et al., 2006)) and are provided as a reference. BG505 Env variants are from 6 weeks (W6, purple), 14 weeks (W14, blue) and 27 months (M27, green) of age. Each Envelope sequence is indicated as either maternal (MG505) or infant (BG505), followed by the time of isolation, the source (P=plasma; M= PBMCs), and then a letter and number combination for tracking that is based on the PCR (letter) and clone number.

**A**

|                   | Month 27<br>Plasma IC50 |
|-------------------|-------------------------|
| BG505.W6M.ENV.A5  | 581                     |
| BG505.W6M.ENV.B1  | 553                     |
| BG505.W6M.ENV.C2  | 711                     |
| BG505.W14P.ENV.J1 | 363                     |
| BG505.W14P.ENV.J2 | 533                     |
| BG505.W14P.ENV.S2 | 722                     |
| BG505.W14P.ENV.P1 | 763                     |
| BG505.W14P.ENV.Q3 | 883                     |
| BG505.W14P.ENV.L2 | 892                     |
| BG505.W14P.ENV.X2 | 915                     |
| BG505.W14P.ENV.T2 | 1120                    |
| BG505.M27P.ENV.X1 | 222                     |
| BG505.M27P.ENV.W2 | 229                     |
| BG505.M27P.ENV.R6 | 232                     |
| BG505.M27P.ENV.T1 | 260                     |
| BG505.M27P.ENV.Q1 | 283                     |
| BG505.M27P.ENV.U1 | 285                     |
| BG505.M27P.ENV.W5 | 317                     |
| BG505.M27P.ENV.P1 | 332                     |
| BG505.M27P.ENV.Z1 | 353                     |
| BG505.M27P.ENV.G1 | 406                     |
| BG505.M27P.ENV.L1 | 445                     |
| BG505.M27P.ENV.G2 | 581                     |
| BG505.M27P.ENV.M2 | 643                     |
| BG505.M27P.ENV.J4 | 1105                    |
| BG505.M27P.ENV.K1 | 1875                    |
| SIV               | <1:100                  |

**B**

| Family | Antibody | BG505 Env Isolates |         |     |     |     |          |     |     |     |  |
|--------|----------|--------------------|---------|-----|-----|-----|----------|-----|-----|-----|--|
|        |          | Week 6             | Week 14 |     |     |     | Month 27 |     |     |     |  |
|        |          | C2                 | J1      | Q3  | X2  | P1  | J4       | M2  | T1  | Z1  |  |
| 1      | BG505.02 | >20                | >20     | >20 | >20 | >20 | >20      | >20 | >20 | >20 |  |
|        | BG505.03 | >20                | >20     | >20 | >20 | >20 | >20      | >20 | >20 | >20 |  |
| 2      | BG505.12 | >20                | >20     | >20 | >20 | >20 | >20      | >20 | >20 | >20 |  |
| 3      | BG505.21 | >20                | >20     | >20 | >20 | >20 | >20      | >20 | >20 | >20 |  |
|        | BG505.23 | >20                | >20     | >20 | >20 | >20 | >20      | >20 | >20 | >20 |  |
| 4      | BG505.26 | >20                | >20     | >20 | >20 | >20 | >20      | >20 | >20 | >20 |  |
|        | BG505.27 | >20                | >20     | >20 | >20 | >20 | >20      | >20 | >20 | >20 |  |
|        | BG505.33 | >20                | >20     | >20 | >20 | >20 | >20      | >20 | >20 | >20 |  |
|        | BG505.35 | >20                | >20     | >20 | >20 | >20 | >20      | >20 | >20 | >20 |  |
| 6      | BG505.36 | >20                | >20     | >20 | >20 | >20 | >20      | >20 | >20 | >20 |  |
|        | BG505.37 | >20                | >20     | >20 | >20 | >20 | >20      | >20 | >20 | >20 |  |
| 7      | BG505.40 | >20                | >20     | >20 | >20 | >20 | >20      | >20 | >20 | >20 |  |
|        | BG505.42 | >20                | >20     | >20 | >20 | >20 | >20      | >20 | >20 | >20 |  |
| 10     | BG505.48 | >20                | >20     | >20 | >20 | >20 | >20      | >20 | >20 | >20 |  |
| 12     | BG505.51 | >20                | >20     | >20 | >20 | >20 | >20      | >20 | >20 | >20 |  |
| 13     | BG505.52 | >20                | >20     | >20 | >20 | >20 | >20      | >20 | >20 | >20 |  |
|        | BG505.54 | >20                | >20     | >20 | >20 | >20 | >20      | >20 | >20 | >20 |  |
| 14     | BG505.59 | >20                | >20     | >20 | >20 | >20 | >20      | >20 | >20 | >20 |  |
| 15     | BG505.60 | >20                | >20     | >20 | >20 | >20 | >20      | >20 | >20 | >20 |  |
| 16     | BG505.62 | >20                | >20     | >20 | >20 | >20 | >20      | >20 | >20 | >20 |  |
|        | BG505.65 | >20                | >20     | >20 | >20 | >20 | >20      | >20 | >20 | >20 |  |
| 17     | BG505.68 | >20                | >20     | >20 | >20 | >20 | >20      | >20 | >20 | >20 |  |

**Figure S2. Neutralization of autologous variants by BG505 plasma, related to Figure 3.** (A) BG505 M27 plasma neutralization of autologous Env variants in rows that were from 6 weeks (W6), 14 weeks (W14) and 27 months (M27) of age. SIV was included as a negative control. (B) BG505 nAbs are in rows and autologous Env isolates in columns. Gray indicates that 50% neutralization was not achieved at the highest mAb concentration tested.

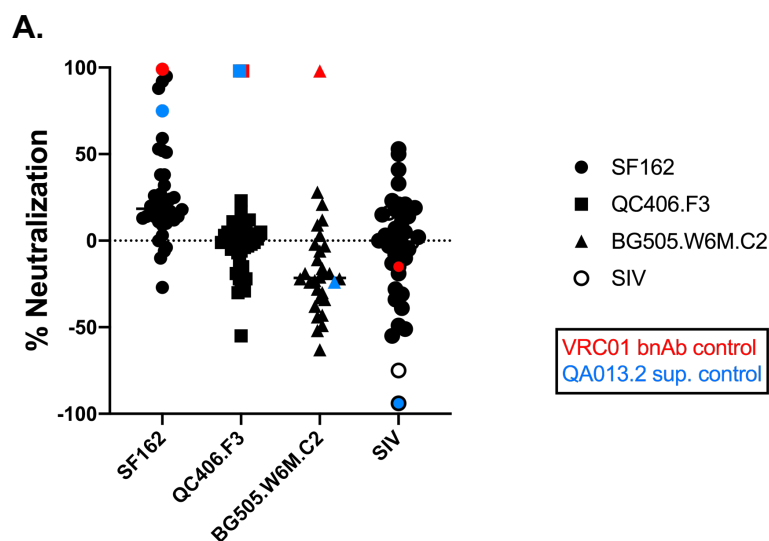

**B.**

| Family | Antibody | Heavy Chain      | CDRH3 Length (AAs) | VH SHM (%nt) | Light Chain | CDRL3 Length (AAs) | VL SHM (%nt) | Autologous Neutralization of BG505 Virus |      |          |           | Heterologous Neutralization of HIV-1 Pseudoviruses |         |         |         |     |         |     |         |     |
|--------|----------|------------------|--------------------|--------------|-------------|--------------------|--------------|------------------------------------------|------|----------|-----------|----------------------------------------------------|---------|---------|---------|-----|---------|-----|---------|-----|
|        |          |                  |                    |              |             |                    |              | Variants                                 |      |          | Tier 1    |                                                    |         |         | Tier 2  |     |         |     |         |     |
|        |          |                  |                    |              |             |                    |              | W6                                       | W14  | M27      | Clade B   |                                                    | Clade A |         | Clade B |     | Clade C |     | Clade D |     |
| A5     | B1       | C2               | P1                 | Q3           | X1          | SF162              | Q461.D1      | Q842.d16                                 | 6535 | QC406.F3 | CAP210.E8 | QD435.A4                                           |         |         |         |     |         |     |         |     |
|        |          | BG505 M27 Plasma |                    |              |             |                    |              | 581                                      | 553  | 711      | 763       | 883                                                | 222     | >3200   | >3200   | 482 | 154     | 971 | 590     | 548 |
| 13     | BG505.70 | V5-51 D2-21 J3   | 22                 | 5.9          | KV1-9 J3    | 11                 | 15.8         | >50                                      | >50  | >50      | >50       | >50                                                | >50     | <1.5625 | <1.5625 | 7.0 | >50     | >50 | >50     | >50 |
| 2      | BG505.71 | V1-69 D4-17 J5   | 10                 | 10.4         | KV4-1 J1    | 11                 | 5.1          | >50                                      | >50  | >50      | >50       | >50                                                | >50     | <1.5625 | 2.10    | >50 | >50     | >50 | >50     | >50 |
| 19     | BG505.72 | V1-69 D2-2 J6    | 28                 | 9.0          | KV1-33 J4   | 11                 | 11.6         | >50                                      | >50  | >50      | >50       | >50                                                | >50     | 8.45    | 22.8    | >50 | >50     | >50 | >50     | >50 |
| 3      | BG505.73 | V1-69 D2-2 J6    | 28                 | 7.9          | KV3-15 J1   | 10                 | 4.7          | >50                                      | >50  | >50      | >50       | >50                                                | >50     | <1.5625 | <1.5625 | >50 | >50     | >50 | >50     | >50 |

**Figure S3. Isolation of additional M27 mAbs from BG505 using alternative primer sets, related to Figure 1.** (A) Screening summary of the 45 isolated mAbs from BG505 using alternate primer pools (Doria-Rose et al., 2016; Liao et al., 2009). Pseudoviruses used for initial mAb screening are shown on the x-axis, while percent neutralization is shown on the y-axis. All BG505 antibodies and the QA013.2 bnAb (Williams et al., 2018) were tested at a 1:2 dilution of unpurified supernatant three days following transfection. VRC01 bnAb was tested at 50 ug/mL final concentration. (B) Autologous and heterologous neutralization profiles of the four nAbs from (A) along with antibody characteristics. Antibodies were tested in serial dilution starting at 50 ug/mL. A second clade C pseudovirus was tested (CAP210.E8), and was not neutralized by any of the BG505 nAbs at 50 ug/mL. SIV was included as a negative control and was not neutralized by BG505 M27 plasma (1:100 dilution) or the four monoclonal nAbs (50 ug/mL). Darker blue shading indicates more potent neutralization. Gray indicates that 50% neutralization was not achieved at the highest mAb concentration tested.

| BG505.57                  |                                                                                           |  | Fold-enrichment |
|---------------------------|-------------------------------------------------------------------------------------------|--|-----------------|
| HIV_BG505.W6.C2 Reference | IRSENITNNAKNIIVQFNTFVQINCTRPNNNTRKSIIRIGPGQAFYATGDIIGDIRQAHCTVSKATWNETLQKVVQKLRKH         |  |                 |
| HIV_Env_BG505.W6.C2       | -----KNILVQFNTFVQINCTRPNNNTRKSIIRIGPGQAFYATGDIIGDIRQAHCTVSKATWNETLQKVVQKLRKH-----         |  | 435             |
| HIV_Env_CladeA1           | -----VQLTKPVKINCTRPNNNTRKSIIRIGPGQAFYATGDIIGDIRQAHCTVSKATWNETLQKVVQKLRKH-----             |  | 465             |
| HIV_Env_CladeC            | -----EIVCTRPNNNTRKSIIRIGPGQAFYATGDIIGDIRQAHCTVSKATWNETLQKVVQKLRKH-----                    |  | 376             |
| HIV_Env_Q23               | -----VQPVTKICIRPNNNTRKSIIRIGPGQAFYATGDIIGDIRQAHCTVSKATWNETLQKVVQKLRKH-----                |  | 310             |
| HIV_Env_BG505.W6.C2       | -----NTRKSIIRIGPGQAFYATGDIIGDIRQAHCTVSKATWNETLQKVVQKLRKH-----                             |  | 249             |
| HIV_Env_CladeB            | -----RKSIIHGPGRAFYTGEIIGDIRQAHCTVSKATWNETLQKVVQKLRKH-----                                 |  | 191             |
| HIV_Env_Q461.d1           | -----CIRPGNTRKSIIRIGPGQAFYATGDIIGDIRQAHCTVSKATWNETLQKVVQKLRKH-----                        |  | 107             |
| HIV_Env_QB850.632p.B10    | -----PNNNTRKSIIRIGPGQAFYATGDIIGDIRQAHCTVSKATWNETLQKVVQKLRKH-----                          |  | 63              |
| HIV_Env_QB850.72p.C14.A1  | -----RTSIRIGPGQAFYATGDIIGDIRQAHCTVSKATWNETLQKVVQKLRKH-----                                |  | 37              |
| HIV_Env_CladeA2           | -----NKPVPITCIRPNNNTRKSIIRIGPGQAFYATGDIIGDIRQAHCTVSKATWNETLQKVVQKLRKH-----                |  | 31              |
| HIV_Env_CladeB            | -----IIVQLNESVEINCTRPNNNTRKSIIRIGPGQAFYATGDIIGDIRQAHCTVSKATWNETLQKVVQKLRKH-----           |  | 27              |
| HIV_Env_CladeC            | -----RSENLNNAKNIIVQFNTFVQINCTRPNNNTRKSIIRIGPGQAFYATGDIIGDIRQAHCTVSKATWNETLQKVVQKLRKH----- |  | 14              |
| HIV_Env_Q461.d1           | -----NITNNAKNIIVQFNTFVQINCTRPNNNTRKSIIRIGPGQAFYATGDIIGDIRQAHCTVSKATWNETLQKVVQKLRKH-----   |  | 5               |
| HIV_Env_BF520.W14.C2      | -----QLASPVITNCIRPNNNTRKSIIRIGPGQAFYATGDIIGDIRQAHCTVSKATWNETLQKVVQKLRKH-----              |  |                 |
| HIV_Env_QA013.701.ENV.H1  | -----LNESVPICTRPNNNTRKSIIRIGPGQAFYATGDIIGDIRQAHCTVSKATWNETLQKVVQKLRKH-----                |  |                 |
| HIV_Env_QA013.385M.ENV.R3 | -----IKINCRPNNNTRKSIIRIGPGQAFYATGDIIGDIRQAHCTVSKATWNETLQKVVQKLRKH-----                    |  |                 |
| HIV_Env_QB850.72p.C14.A1  | -----IIVQLNESVIINCTRPNNNTRKSIIRIGPGQAFYATGDIIGDIRQAHCTVSKATWNETLQKVVQKLRKH-----           |  |                 |
| HIV_Env_QB850.632p.B10    | -----NNAKNIIVQLNESVIINCTRPNNNTRKSIIRIGPGQAFYATGDIIGDIRQAHCTVSKATWNETLQKVVQKLRKH-----      |  |                 |
| HIV_Env_QC406.F3          | -----IIVHLKEPVSINCTRPNNNTRKSIIRIGPGQAFYATGDIIGDIRQAHCTVSKATWNETLQKVVQKLRKH-----           |  |                 |
| HIV_Env_CladeD            | -----VQLNESVTINCTRPNNNTRKSIIRIGPGQAFYATGDIIGDIRQAHCTVSKATWNETLQKVVQKLRKH-----             |  |                 |
| HIV_Env_BF520.W14.C2      | -----VHLGPGQAFYATGDIIGDIRQAHCTVSKATWNETLQKVVQKLRKH-----                                   |  |                 |
| HIV_Env_CladeA2           | -----FEGGQAFYATGDIIGDIRQAHCTVSKATWNETLQKVVQKLRKH-----                                     |  |                 |
| HIV_Env_CladeC            | -----QIYATGDIIGDIRQAHCTVSKATWNETLQKVVQKLRKH-----                                          |  |                 |
| HIV_Env_CladeD            | -----RTPIFGQALMT-TRIKGDIRQAHCTVSKATWNETLQKVVQKLRKH-----                                   |  |                 |
| HIV_Env_Q23               | -----IGPGQAFYATGDIIGDIRQAHCTVSKATWNETLQKVVQKLRKH-----                                     |  |                 |
| HIV_Env_QA013.701.ENV.H1  | -----HMGEGRALFT-ERIVGDIRQAHCTVSKATWNETLQKVVQKLRKH-----                                    |  |                 |
| HIV_Env_QA013.385M.ENV.R3 | -----QAFYATGDIIGDIRQAHCTVSKATWNETLQKVVQKLRKH-----                                         |  |                 |
| HIV_Env_QC406.F3          | -----RESIIGPGQAFYATGDIIGDIRQAHCTVSKATWNETLQKVVQKLRKH-----                                 |  |                 |
| HIV_Env_CladeA1           | -----SIRIGPGQAFYATGDIIGDIRQAHCTVSKATWNETLQKVVQKLRKH-----                                  |  |                 |
| BG505.61                  |                                                                                           |  |                 |
| HIV_BG505.W6.C2 Reference | IRSENITNNAKNIIVQFNTFVQINCTRPNNNTRKSIIRIGPGQAFYATGDIIGDIRQAHCTVSKATWNETLQKVVQKLRKH         |  | Fold-enrichment |
| HIV_Env_CladeA1           | -----VQLTKPVKINCTRPNNNTRKSIIRIGPGQAFYATGDIIGDIRQAHCTVSKATWNETLQKVVQKLRKH-----             |  | 478             |
| HIV_Env_BG505.W6.C2       | -----KNILVQFNTFVQINCTRPNNNTRKSIIRIGPGQAFYATGDIIGDIRQAHCTVSKATWNETLQKVVQKLRKH-----         |  | 472             |
| HIV_Env_CladeC            | -----EIVCTRPNNNTRKSIIRIGPGQAFYATGDIIGDIRQAHCTVSKATWNETLQKVVQKLRKH-----                    |  | 396             |
| HIV_Env_Q23               | -----VQPVTKICIRPNNNTRKSIIRIGPGQAFYATGDIIGDIRQAHCTVSKATWNETLQKVVQKLRKH-----                |  | 332             |
| HIV_Env_BG505.W6.C2       | -----NTRKSIIRIGPGQAFYATGDIIGDIRQAHCTVSKATWNETLQKVVQKLRKH-----                             |  | 211             |
| HIV_Env_CladeB            | -----RKSIIHGPGRAFYTGEIIGDIRQAHCTVSKATWNETLQKVVQKLRKH-----                                 |  | 189             |
| HIV_Env_Q461.d1           | -----CIRPGNTRKSIIRIGPGQAFYATGDIIGDIRQAHCTVSKATWNETLQKVVQKLRKH-----                        |  | 90              |
| HIV_Env_QB850.72p.C14.A1  | -----RTSIRIGPGQAFYATGDIIGDIRQAHCTVSKATWNETLQKVVQKLRKH-----                                |  | 69              |
| HIV_Env_QB850.632p.B10    | -----PNNNTRKSIIRIGPGQAFYATGDIIGDIRQAHCTVSKATWNETLQKVVQKLRKH-----                          |  | 51              |
| HIV_Env_CladeB            | -----IIVQLNESVEINCTRPNNNTRKSIIRIGPGQAFYATGDIIGDIRQAHCTVSKATWNETLQKVVQKLRKH-----           |  | 22              |
| HIV_Env_CladeA2           | -----NKPVPITCIRPNNNTRKSIIRIGPGQAFYATGDIIGDIRQAHCTVSKATWNETLQKVVQKLRKH-----                |  | 19              |
| HIV_Env_BF520.W14.C2      | -----QLASPVITNCIRPNNNTRKSIIRIGPGQAFYATGDIIGDIRQAHCTVSKATWNETLQKVVQKLRKH-----              |  |                 |
| HIV_Env_QA013.701.ENV.H1  | -----LNESVPICTRPNNNTRKSIIRIGPGQAFYATGDIIGDIRQAHCTVSKATWNETLQKVVQKLRKH-----                |  |                 |
| HIV_Env_QA013.385M.ENV.R3 | -----IKINCRPNNNTRKSIIRIGPGQAFYATGDIIGDIRQAHCTVSKATWNETLQKVVQKLRKH-----                    |  |                 |
| HIV_Env_QB850.72p.C14.A1  | -----IIVQLNESVIINCTRPNNNTRKSIIRIGPGQAFYATGDIIGDIRQAHCTVSKATWNETLQKVVQKLRKH-----           |  |                 |
| HIV_Env_QB850.632p.B10    | -----NNAKNIIVQLNESVIINCTRPNNNTRKSIIRIGPGQAFYATGDIIGDIRQAHCTVSKATWNETLQKVVQKLRKH-----      |  |                 |
| HIV_Env_QC406.F3          | -----IIVHLKEPVSINCTRPNNNTRKSIIRIGPGQAFYATGDIIGDIRQAHCTVSKATWNETLQKVVQKLRKH-----           |  |                 |
| HIV_Env_CladeD            | -----VQLNESVTINCTRPNNNTRKSIIRIGPGQAFYATGDIIGDIRQAHCTVSKATWNETLQKVVQKLRKH-----             |  |                 |
| HIV_Env_BF520.W14.C2      | -----VHLGPGQAFYATGDIIGDIRQAHCTVSKATWNETLQKVVQKLRKH-----                                   |  |                 |
| HIV_Env_CladeA2           | -----FEGGQAFYATGDIIGDIRQAHCTVSKATWNETLQKVVQKLRKH-----                                     |  |                 |
| HIV_Env_CladeC            | -----QIYATGDIIGDIRQAHCTVSKATWNETLQKVVQKLRKH-----                                          |  |                 |
| HIV_Env_CladeD            | -----RTPIFGQALMT-TRIKGDIRQAHCTVSKATWNETLQKVVQKLRKH-----                                   |  |                 |
| HIV_Env_Q23               | -----IGPGQAFYATGDIIGDIRQAHCTVSKATWNETLQKVVQKLRKH-----                                     |  |                 |
| HIV_Env_QA013.701.ENV.H1  | -----HMGEGRALFT-ERIVGDIRQAHCTVSKATWNETLQKVVQKLRKH-----                                    |  |                 |
| HIV_Env_QA013.385M.ENV.R3 | -----QAFYATGDIIGDIRQAHCTVSKATWNETLQKVVQKLRKH-----                                         |  |                 |
| HIV_Env_QC406.F3          | -----RESIIGPGQAFYATGDIIGDIRQAHCTVSKATWNETLQKVVQKLRKH-----                                 |  |                 |
| HIV_Env_CladeA1           | -----SIRIGPGQAFYATGDIIGDIRQAHCTVSKATWNETLQKVVQKLRKH-----                                  |  |                 |
| BG505.63                  |                                                                                           |  |                 |
| HIV_BG505.W6.C2 Reference | IRSENITNNAKNIIVQFNTFVQINCTRPNNNTRKSIIRIGPGQAFYATGDIIGDIRQAHCTVSKATWNETLQKVVQKLRKH         |  | Fold-enrichment |
| HIV_Env_BG505.W6.C2       | -----KNILVQFNTFVQINCTRPNNNTRKSIIRIGPGQAFYATGDIIGDIRQAHCTVSKATWNETLQKVVQKLRKH-----         |  | 520             |
| HIV_Env_CladeA1           | -----VQLTKPVKINCTRPNNNTRKSIIRIGPGQAFYATGDIIGDIRQAHCTVSKATWNETLQKVVQKLRKH-----             |  | 498             |
| HIV_Env_CladeC            | -----EIVCTRPNNNTRKSIIRIGPGQAFYATGDIIGDIRQAHCTVSKATWNETLQKVVQKLRKH-----                    |  | 416             |
| HIV_Env_Q23               | -----VQPVTKICIRPNNNTRKSIIRIGPGQAFYATGDIIGDIRQAHCTVSKATWNETLQKVVQKLRKH-----                |  | 364             |
| HIV_Env_BG505.W6.C2       | -----NTRKSIIRIGPGQAFYATGDIIGDIRQAHCTVSKATWNETLQKVVQKLRKH-----                             |  | 254             |
| HIV_Env_Q461.d1           | -----CIRPGNTRKSIIRIGPGQAFYATGDIIGDIRQAHCTVSKATWNETLQKVVQKLRKH-----                        |  | 194             |
| HIV_Env_CladeB            | -----RKSIIHGPGRAFYTGEIIGDIRQAHCTVSKATWNETLQKVVQKLRKH-----                                 |  | 115             |
| HIV_Env_QB850.72p.C14.A1  | -----RTSIRIGPGQAFYATGDIIGDIRQAHCTVSKATWNETLQKVVQKLRKH-----                                |  | 45              |
| HIV_Env_QB850.632p.B10    | -----PNNNTRKSIIRIGPGQAFYATGDIIGDIRQAHCTVSKATWNETLQKVVQKLRKH-----                          |  | 45              |
| HIV_Env_CladeB            | -----IIVQLNESVEINCTRPNNNTRKSIIRIGPGQAFYATGDIIGDIRQAHCTVSKATWNETLQKVVQKLRKH-----           |  | 8               |
| HIV_Env_BF520.W14.C2      | -----QLASPVITNCIRPNNNTRKSIIRIGPGQAFYATGDIIGDIRQAHCTVSKATWNETLQKVVQKLRKH-----              |  |                 |
| HIV_Env_QA013.701.ENV.H1  | -----LNESVPICTRPNNNTRKSIIRIGPGQAFYATGDIIGDIRQAHCTVSKATWNETLQKVVQKLRKH-----                |  |                 |
| HIV_Env_QA013.385M.ENV.R3 | -----IKINCRPNNNTRKSIIRIGPGQAFYATGDIIGDIRQAHCTVSKATWNETLQKVVQKLRKH-----                    |  |                 |
| HIV_Env_QB850.72p.C14.A1  | -----IIVQLNESVIINCTRPNNNTRKSIIRIGPGQAFYATGDIIGDIRQAHCTVSKATWNETLQKVVQKLRKH-----           |  |                 |
| HIV_Env_QB850.632p.B10    | -----NNAKNIIVQLNESVIINCTRPNNNTRKSIIRIGPGQAFYATGDIIGDIRQAHCTVSKATWNETLQKVVQKLRKH-----      |  |                 |
| HIV_Env_QC406.F3          | -----IIVHLKEPVSINCTRPNNNTRKSIIRIGPGQAFYATGDIIGDIRQAHCTVSKATWNETLQKVVQKLRKH-----           |  |                 |
| HIV_Env_CladeD            | -----VQLNESVTINCTRPNNNTRKSIIRIGPGQAFYATGDIIGDIRQAHCTVSKATWNETLQKVVQKLRKH-----             |  |                 |
| HIV_Env_Q461.d1           | -----NITNNAKNIIVQFNTFVQINCTRPNNNTRKSIIRIGPGQAFYATGDIIGDIRQAHCTVSKATWNETLQKVVQKLRKH-----   |  |                 |
| HIV_Env_CladeA2           | -----NKPVPITCIRPNNNTRKSIIRIGPGQAFYATGDIIGDIRQAHCTVSKATWNETLQKVVQKLRKH-----                |  |                 |
| HIV_Env_BF520.W14.C2      | -----VHLGPGQAFYATGDIIGDIRQAHCTVSKATWNETLQKVVQKLRKH-----                                   |  |                 |
| HIV_Env_CladeA2           | -----FEGGQAFYATGDIIGDIRQAHCTVSKATWNETLQKVVQKLRKH-----                                     |  |                 |
| HIV_Env_CladeC            | -----QIYATGDIIGDIRQAHCTVSKATWNETLQKVVQKLRKH-----                                          |  |                 |
| HIV_Env_CladeD            | -----RTPIFGQALMT-TRIKGDIRQAHCTVSKATWNETLQKVVQKLRKH-----                                   |  |                 |
| HIV_Env_Q23               | -----IGPGQAFYATGDIIGDIRQAHCTVSKATWNETLQKVVQKLRKH-----                                     |  |                 |
| HIV_Env_QA013.701.ENV.H1  | -----HMGEGRALFT-ERIVGDIRQAHCTVSKATWNETLQKVVQKLRKH-----                                    |  |                 |
| HIV_Env_QA013.385M.ENV.R3 | -----QAFYATGDIIGDIRQAHCTVSKATWNETLQKVVQKLRKH-----                                         |  |                 |
| HIV_Env_QC406.F3          | -----RESIIGPGQAFYATGDIIGDIRQAHCTVSKATWNETLQKVVQKLRKH-----                                 |  |                 |
| HIV_Env_CladeA1           | -----SIRIGPGQAFYATGDIIGDIRQAHCTVSKATWNETLQKVVQKLRKH-----                                  |  |                 |

**Figure S4. Peptide enrichment for three antibodies tested in PhIP-seq, related to Figure 4.** Alignments in black show the peptides that were significantly enriched in both conditions (2 ng, 20 ng), arranged in descending order of fold-enrichment. Alignments in red show peptides that span this region that were not significantly enriched in both conditions tested. Residues in blue signify where the minimal epitope was extended in cases where there was weak but significant enrichment of a peptide that truncated the minimal epitope sequence. Common sequences among all the enriched peptides are highlighted in gray.

|          | gp120   |         |         |       |           |       |         |        |         |      |         |       |         |      |         |       |         | gp140         |         | gp41 |          | V1V2 Scaffolds |  | V3 Peptides |  |  |  | RSC3 | Trimer | Epitope specificity |  | RF-ADCC activity |
|----------|---------|---------|---------|-------|-----------|-------|---------|--------|---------|------|---------|-------|---------|------|---------|-------|---------|---------------|---------|------|----------|----------------|--|-------------|--|--|--|------|--------|---------------------|--|------------------|
|          | Clade A |         | Clade A |       | Clade A/D |       | Clade B |        | Clade C |      | Clade A |       | Clade B |      | Clade C |       | Clade D |               | Clade A |      | PHIP-seq | BAMA           |  |             |  |  |  |      |        |                     |  |                  |
|          | BG505   | Q461.01 | BLO35   | SF162 | ZM109     | ConA  | MN      | ZA1197 | ZM109   | ZM53 | ConA    | ConB  | ConC    | ConD | RSC3    | BG505 |         |               |         |      |          |                |  |             |  |  |  |      |        |                     |  |                  |
|          |         |         |         |       |           |       |         |        |         |      |         |       |         |      |         |       |         |               |         |      |          |                |  |             |  |  |  |      |        |                     |  |                  |
| BG505.13 | 23113   | 18527   | 245     | 345   | 8915      | 7908  | 377     | 1      | 0       | 0    | 26454   | 269   | 26323   | 16   | 8       | 8553  | V3      | V3            | -1      |      |          |                |  |             |  |  |  |      |        |                     |  |                  |
| BG505.34 | 23889   | 23511   | 23824   | 1266  | 16250     | 12376 | 436     | 8      | 0       | 0    | 26433   | 25965 | 27194   | 23   | 12      | 15248 | V3      | V3            | 58      |      |          |                |  |             |  |  |  |      |        |                     |  |                  |
| BG505.48 | 23854   | 21257   | 23694   | 526   | 1041      | 11916 | 395     | 2      | 0       | 0    | 26191   | 25659 | 26987   | 19   | 11      | 15400 | V3      | V3            | 77      |      |          |                |  |             |  |  |  |      |        |                     |  |                  |
| BG505.49 | 20908   | 20243   | 20747   | 161   | 1402      | 7058  | 326     | 2      | 0       | 0    | 25468   | 23722 | 26113   | 18   | 3       | 3665  | V3      | V3            | 39      |      |          |                |  |             |  |  |  |      |        |                     |  |                  |
| BG505.50 | 23605   | 22647   | 23745   | 291   | 1453      | 9521  | 379     | 4      | 0       | 0    | 25788   | 25213 | 26744   | 17   | 10      | 14968 | V3      | V3            | 59      |      |          |                |  |             |  |  |  |      |        |                     |  |                  |
| BG505.56 | 23813   | 23435   | 23866   | 2010  | 11200     | 13331 | 420     | 6      | 0       | 0    | 26031   | 25490 | 26817   | 21   | 7       | 14285 | V3      | V3            | 62      |      |          |                |  |             |  |  |  |      |        |                     |  |                  |
| BG505.57 | 23838   | 23449   | 23869   | 2029  | 10490     | 13610 | 437     | 5      | 0       | 0    | 26207   | 25590 | 26785   | 23   | 5       | 14232 | V3      | V3            | 62      |      |          |                |  |             |  |  |  |      |        |                     |  |                  |
| BG505.61 | 23779   | 23898   | 23815   | 759   | 4518      | 12517 | 424     | 4      | 0       | 0    | 26231   | 25477 | 26892   | 22   | 8       | 15894 | V3      | V3            | 71      |      |          |                |  |             |  |  |  |      |        |                     |  |                  |
| BG505.63 | 23672   | 23775   | 23759   | 527   | 8209      | 12976 | 421     | 2      | 0       | 0    | 26230   | 25726 | 26974   | 23   | 10      | 16357 | V3      | V3            | 82      |      |          |                |  |             |  |  |  |      |        |                     |  |                  |
| BG505.68 | 23526   | 21396   | 23505   | 880   | 1102      | 10959 | 403     | 3      | 0       | 0    | 25978   | 25462 | 26707   | 19   | 10      | 11306 | V3      | V3            | 58      |      |          |                |  |             |  |  |  |      |        |                     |  |                  |
| BG505.69 | 23880   | 23309   | 23899   | 671   | 6805      | 13223 | 431     | 3      | 0       | 0    | 26504   | 25940 | 27074   | 20   | 11      | 15959 | V3      | V3            | 83      |      |          |                |  |             |  |  |  |      |        |                     |  |                  |
| BG505.23 | 3633    | 5194    | 251     | 1928  | 2796      | 65    | 27      | 3      | 2       | 15   | 47      | 26    | 20      | 9    | 13      | 1371  | no hit  | gp120, trimer | 0       |      |          |                |  |             |  |  |  |      |        |                     |  |                  |
| BG505.25 | 4422    | 6335    | 494     | 3488  | 3296      | 82    | 39      | 3      | 1       | 18   | 42      | 24    | 11      | 10   | 11      | 2165  | no hit  | gp120, trimer | 0       |      |          |                |  |             |  |  |  |      |        |                     |  |                  |
| BG505.36 | 4246    | 6589    | 32      | 65    | 2673      | 68    | 43      | 1      | 2       | 21   | 44      | 24    | 13      | 10   | 7       | 1322  | no hit  | gp120, trimer | 0       |      |          |                |  |             |  |  |  |      |        |                     |  |                  |
| BG505.03 | 18      | 12      | 2       | 20    | 782       | 8     | 1       | 1      | 0       | 18   | 36      | 18    | 7       | 7    | 1       | 334   | no hit  | no hit        | 1       |      |          |                |  |             |  |  |  |      |        |                     |  |                  |
| BG505.19 | 2       | 1       | 0       | 1     | 14        | 2     | 1       | 0      | 2       | 14   | 39      | 20    | 6       | 7    | 1       | 269   | no hit  | no hit        | 4       |      |          |                |  |             |  |  |  |      |        |                     |  |                  |
| BG505.42 | 37      | 63      | 6       | 90    | 352       | 10    | 1       | 0      | 1       | 11   | 38      | 19    | 7       | 6    | 2       | 290   | no hit  | no hit        | 64      |      |          |                |  |             |  |  |  |      |        |                     |  |                  |
| BG505.46 | 74      | 113     | 28      | 108   | 278       | 29    | 3       | 1      | 0       | 7    | 159     | 101   | 145     | 8    | 2       | 407   | no hit  | no hit        | 55      |      |          |                |  |             |  |  |  |      |        |                     |  |                  |
| BG505.47 | 243     | 270     | 22      | 102   | 5         | 6     | 3       | 0      | 1       | 15   | 36      | 19    | 7       | 8    | 2       | 119   | no hit  | no hit        | -2      |      |          |                |  |             |  |  |  |      |        |                     |  |                  |

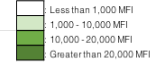

**Figure S5. BG505 mAb binding to HIV antigens as determined by binding antibody multiplex assay (BAMA), related to Figures 2 and 4. mAbs were assayed at 25 µg/mL for binding to various HIV antigens. Binding results are reported as the average median fluorescent intensity (MFI) of background-subtracted technical duplicates.**
